# Supplementary material
Source: PubMed Central journal article supplement (PMC5837452)

## SUPPLEMENTARY INFORMATION

### **Dioxin Exposure Alters Molecular and Morphological Responses to Thyroid Hormone in *Xenopus laevis* Cultured Cells and Prometamorphic Tadpoles**

Justin D. Taft<sup>1,\*</sup>, Megan M. Colonna<sup>1,†</sup>, Rachel E. Schafer, Natalie Plick<sup>‡</sup>, and Wade H. Powell<sup>\*</sup>

Biology Department  
Kenyon College  
Gambier, OH 43022 USA

**Figure S1. TR and AHR target mRNAs by T3 and graded concentrations of TCDD.**

(A) *klf9*, (B) *trβa*, (C) *trβb*, (D): *cyp1a6*, (E): *udpgt-1a*. XLK-WG cells were exposed to the indicated combinations of T3, TCDD, and/or DMSO vehicle (0.25%) for 24 h as indicated. mRNA abundance was measured by qPCR with β-actin as endogenous control and relative expression calculated by the  $\Delta\Delta C_t$  method. Bars represent the mean relative expression value from three technical replicates on a single plate. The experiment was repeated 2-3 times; a representative figure is depicted

**Figure S2. TR and AHR target mRNAs by T3 and graded concentrations of FICZ.**

(A) *klf9*, (B) *trβa*, (C) *trβb*, (D): *cyp1a6*, (E): *udpgt-1a*. XLK-WG cells were exposed to the indicated combinations of T3, FICZ, and/or DMSO vehicle (0.25%) for 3 h as indicated. mRNA abundance was measured by qPCR with β-actin as endogenous control and relative expression calculated by the  $\Delta\Delta C_t$  method. Bars represent the mean relative expression value from three technical replicates on a single plate. The experiment was repeated twice; a representative figure is depicted.

A: *klf9*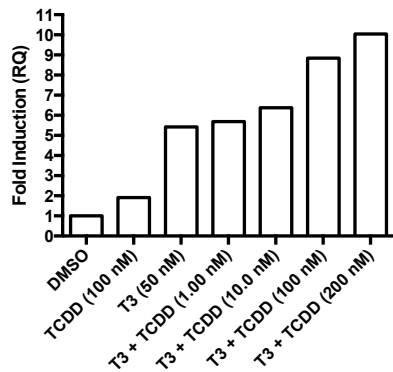B: *trβa*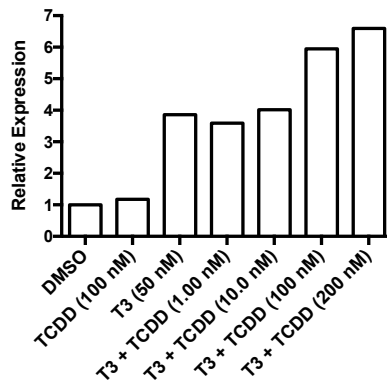C: *trβb*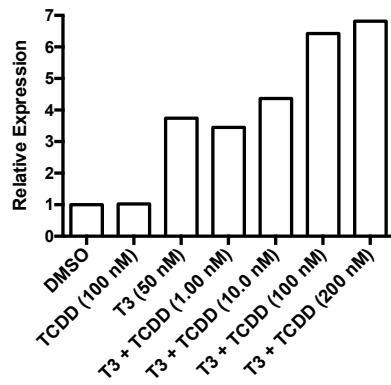D: *cyp1a6*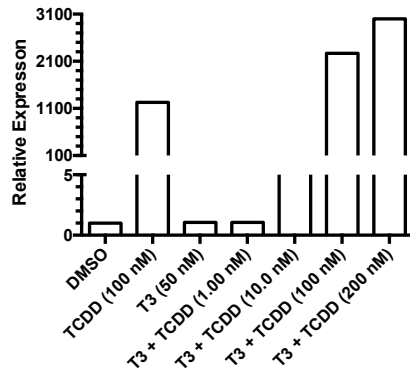E: *ugt1a*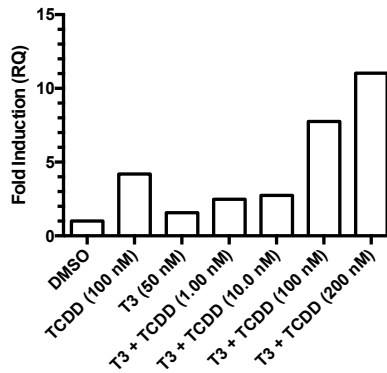

A: *klf9*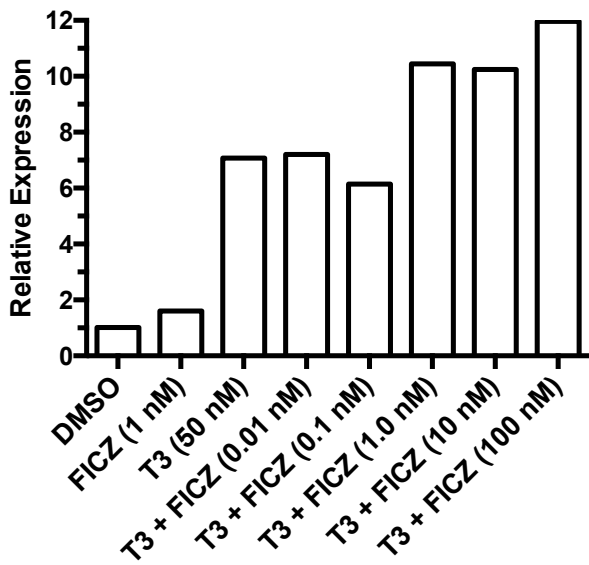B: *trβa*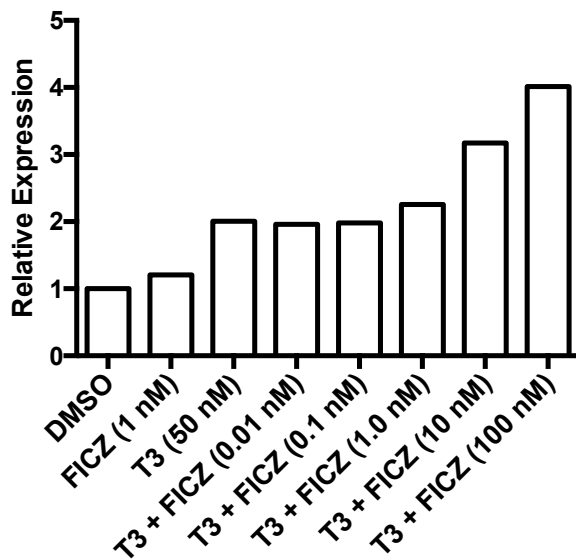C: *trβb*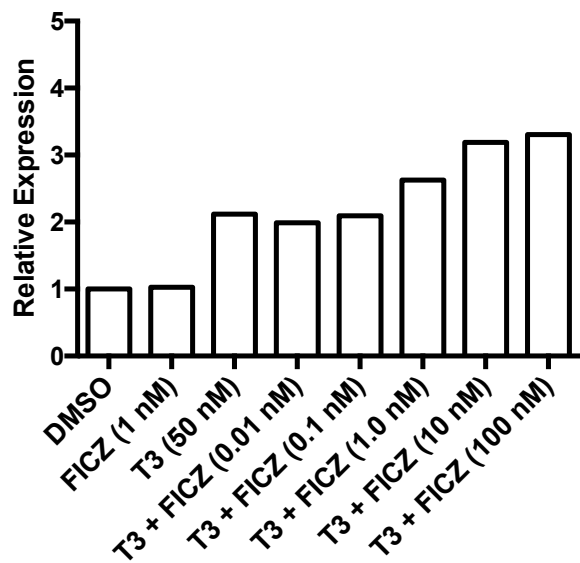D: *cyp1a6*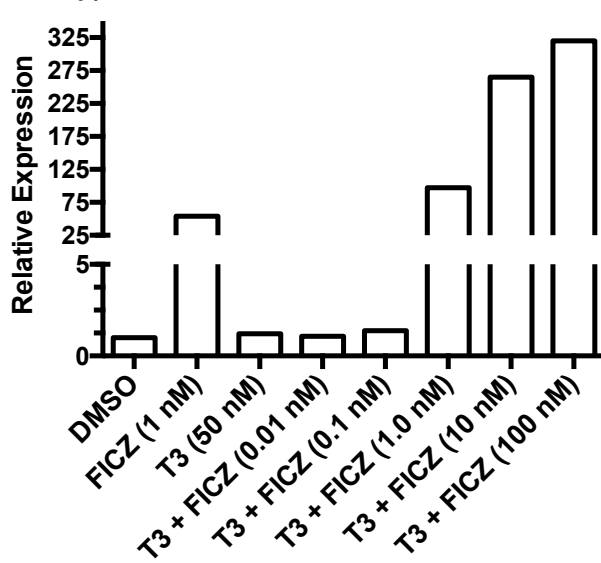

Supplement: kfx213_supp.pdf [file kfx213_supp.pdf]
